# Supplementary material for: Detection and dietary intake risk assessment of fungicides residues in agro-products by UPLC-MS/MS with modified QuEChERS
Source: Research Square preprint supplement (doi:10.21203/rs.3.rs-1826494/v1), 2022-08-02
Supplement: Supplementary file 1 [file bc582da39778752ce8175307.docx]

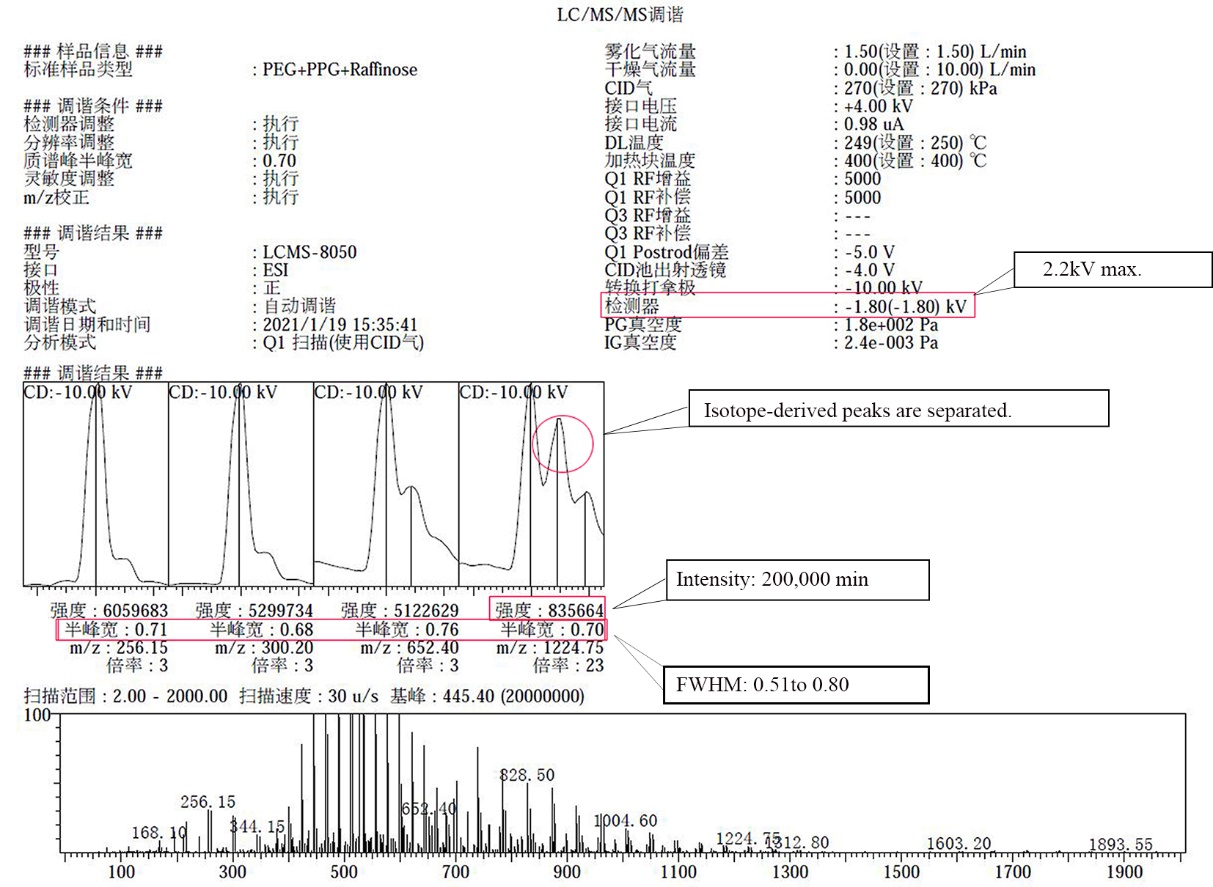


**Figure S1.** The tuning results report.

The tuning results are marked with red lines, and the corresponding parameter ranges for successful tuning are marked with black lines.
