# Supplementary material for: Detection and dietary intake risk assessment of fungicides residues in agro-products by UPLC-MS/MS with modified QuEChERS
Source: Research Square preprint supplement (doi:10.21203/rs.3.rs-1826494/v1), 2022-08-02
Supplement: Supplementary file 2 [file d3bea34e4ae8e9270fd0c747.xlsx]

## Sheet: result
		多菌灵9	甲霜灵5	嘧霉胺5	烯酰吗啉dimethomorph12	三唑酮5	苯醚甲环唑15	戊唑醇18	丙环唑9
HDWX-19-SC036	韭菜	-0.001	-0.001	-0.001	-0.001	-0.001	-0.001	-0.001	-0.001
HDWX-19-SC037	洋葱4	0.092	-0.001	0.157	-0.001	-0.001	0.006	0.007	-0.001
HDWX-19-SC038	洋白菜	-0.001	-0.001	-0.001	-0.001	-0.001	-0.001	-0.001	-0.001
HDGP-19-SC039	菠菜1	-0.001	-0.001	-0.001	-0.001	-0.001	-0.001	0.007	-0.001
HDGP-19-SC040	大白菜	-0.001	-0.001	-0.001	-0.001	-0.001	-0.001	-0.001	-0.001
HDGP-19-SC041	西兰花1	-0.001	-0.001	-0.001	-0.001	-0.001	-0.001	0.007	-0.001
HDWA-19-SC042韭菜	韭菜	-0.001	-0.001	-0.001	-0.001	-0.001	-0.001	-0.001	-0.001
HDWA-19-SC043芹菜	芹菜6	0.022	-0.001	-0.001	0.013	0.012	0.374	0.007	0.008
HDWA-19-SC044香菜	香菜3	-0.001	-0.001	-0.001	0.01	0.008	0.118	-0.001	-0.001
HDWA-19-SC045	油麦菜6	0.176	0.004	-0.001	2.52	-0.001	1.16	0.009	0.01
HDCX-19-SC0126	大白菜	-0.001	-0.001	-0.001	-0.001	-0.001	-0.001	-0.001	-0.001
HDCX-19-SC0127	茼蒿5	0.092	0.01	0.157	0.084	-0.001	0.072	-0.001	-0.001
HDCX-19-SC0128	菠菜2	-0.001	-0.001	-0.001	-0.001	-0.001	0.009	0.009	-0.001
HDQZ-19-SC0129	油麦菜3	-0.001	-0.001	-0.001	-0.001	-0.001	0.044	0.011	0.634
HDQZ-19-SC0130	蕹菜1	-0.001	-0.001	-0.001	-0.001	-0.001	-0.001	-0.001	0.008
HDQZ-19-SC0131	香菜1	-0.001	-0.001	-0.001	-0.001	-0.001	-0.001	0.007	-0.001
HDJZ-19-SC0132	大白菜2	-0.001	-0.001	-0.001	0.118	-0.001	-0.001	0.008	-0.001
HDJZ-19-SC0133	芹菜7	0.222	0.031	-0.001	0.013	0.012	2.21/2.18	0.474	0.147
HDJZ-19-SC0134	香菜5	0.018	-0.001	-0.001	0.01	0.008	0.032	0.013	-0.001
HDJZ-19-SC0135	叶用莴苣6	0.005	0.17	-0.001	0.012	-0.001	0.016	0.008	0.008
		多菌灵	甲霜灵	嘧霉胺	烯酰吗啉	三唑酮	苯醚甲环唑	戊唑醇	丙环唑
QHD-20-SC-0039		<0.003	<0.003	<0.003	<0.003	<0.003	0.022	<0.003	<0.003
QHD-20-SC-0040		<0.003	<0.003	<0.003	<0.003	<0.003	<0.003	0.006	<0.003
QHD-20-SC-0041		<0.003	<0.003	<0.003	<0.003	<0.003	<0.003	<0.003	<0.003
QHD-20-SC-0042		<0.003	<0.003	<0.003	<0.003	<0.003	<0.003	<0.003	<0.003
QHD-20-SC-0052		<0.003	<0.003	<0.003	<0.003	<0.003	<0.003	<0.003	<0.003
QHD-20-SC-0053		<0.003	<0.003	<0.003	<0.003	<0.003	<0.003	<0.003	<0.003
QHD-20-SC-0054		<0.003	<0.003	<0.003	<0.003	<0.003	<0.003	<0.003	<0.003
QHD-20-SG-0043		<0.003	<0.003	0.136	<0.003	<0.003	<0.003	<0.003	<0.003
QHD-20-SG-0044		<0.003	<0.003	0.137	<0.003	<0.003	<0.003	<0.003	<0.003
QHD-20-SG-0063		<0.003	<0.003	0.75	<0.003	<0.003	<0.003	0.008	<0.003
QHD-20-SG-0064		<0.003	<0.003	<0.003	<0.003	<0.003	<0.003	<0.003	<0.003
QHD-20-SG-0065		<0.003	<0.003	<0.003	<0.003	<0.003	<0.003	0.017	<0.003
		多菌灵	甲霜灵	嘧霉胺	烯酰吗啉	三唑酮	苯醚甲环唑	戊唑醇	丙环唑
HDGT-20-SC-015	辣椒	<0.003	<0.003	<0.003	<0.003	<0.003	<0.003	<0.003	<0.003
HDGT-20-SC-016	香菜	<0.003	<0.003	<0.003	<0.003	<0.003	<0.003	<0.003	<0.003
HDGT-20-SC-017	茼蒿	<0.003	<0.003	<0.003	<0.003	<0.003	<0.003	<0.003	<0.003
HDGT-20-SC-018	茼蒿	<0.003	<0.003	<0.003	<0.003	<0.003	<0.003	<0.003	<0.003
HDQX-20-SC-019	辣椒	<0.003	<0.003	<0.003	<0.003	<0.003	<0.003	<0.003	<0.003
HDQX-20-SC-020	茼蒿	<0.003	<0.003	<0.003	<0.003	<0.003	<0.003	<0.003	<0.003
HDQX-20-SC-021	茼蒿	<0.003	<0.003	<0.003	<0.003	<0.003	<0.003	<0.003	<0.003
HDQX-20-SC-022	香菜	<0.003	<0.003	<0.003	<0.003	<0.003	<0.003	<0.003	<0.003
		多菌灵	甲霜灵	嘧霉胺	烯酰吗啉	三唑酮	苯醚甲环唑	戊唑醇	丙环唑
HDLZ-20-SC-094	辣椒	<0.003	<0.003	<0.003	<0.003	<0.003	<0.003	<0.003	<0.003
HDLZ-20-SC-095	茼蒿	<0.003	<0.003	<0.003	<0.003	<0.003	<0.003	<0.003	<0.003
HDLZ-20-SC-096	香菜	<0.003	<0.003	<0.003	<0.003	<0.003	<0.003	<0.003	<0.003
HDLZ-20-SC-097	辣椒	<0.003	<0.003	<0.003	<0.003	<0.003	<0.003	<0.003	<0.003
HDSX-20-SC-098	辣椒	<0.003	<0.003	<0.003	<0.003	<0.003	<0.003	<0.003	<0.003
HDSX-20-SC-099	茼蒿	<0.003	<0.003	<0.003	<0.003	<0.003	<0.003	<0.003	<0.003
HDSX-20-SC-100	香菜	<0.003	<0.003	<0.003	<0.003	<0.003	<0.003	<0.003	<0.003
HDSX-20-SC-101	辣椒	<0.003	<0.003	<0.003	<0.003	<0.003	<0.003	<0.003	<0.003
		多菌灵	甲霜灵	嘧霉胺	烯酰吗啉	三唑酮	苯醚甲环唑	戊唑醇	丙环唑
HDWA-21-SC-013	叶用莴苣	<0.003	<0.003	<0.003	<0.003	<0.003	<0.003	<0.003	<0.003
HDWA-21-SC-014	菠菜	<0.003	<0.003	<0.003	<0.003	<0.003	<0.003	<0.003	<0.003
HDWA-21-SC-015	马铃薯	<0.003	<0.003	<0.003	<0.003	<0.003	<0.003	<0.003	<0.003
HDWA-21-SC-016	马铃薯	<0.003	<0.003	<0.003	<0.003	<0.003	<0.003	<0.003	<0.003
HDDM-21-SC-017	马铃薯	<0.003	<0.003	<0.003	<0.003	<0.003	<0.003	<0.003	<0.003
HDDM-21-SC-018	叶用莴苣	<0.003	<0.003	<0.003	<0.003	<0.003	<0.003	<0.003	<0.003
HDDM-21-SC-019	马铃薯	<0.003	<0.003	<0.003	<0.003	<0.003	<0.003	<0.003	<0.003
HDDM-21-SC-020	菠菜	<0.003	<0.003	<0.003	<0.003	<0.003	<0.003	<0.003	<0.003
HDCX-21-SC-021	叶用莴苣	<0.003	<0.003	<0.003	<0.003	<0.003	<0.003	<0.003	<0.003
HDCX-21-SC-022	菠菜	<0.003	<0.003	<0.003	<0.003	<0.003	<0.003	<0.003	<0.003
HDCX-21-SC-023	马铃薯	<0.003	<0.003	<0.003	<0.003	<0.003	<0.003	<0.003	<0.003
		多菌灵	甲霜灵	嘧霉胺	烯酰吗啉	三唑酮	苯醚甲环唑	戊唑醇	丙环唑
HDWA-21-SC-077	叶用莴苣	<0.003	<0.003	<0.003	<0.003	<0.003	<0.003	<0.003	<0.003
HDWA-21-SC-078	叶用莴苣	<0.003	<0.003	<0.003	<0.003	<0.003	<0.003	<0.003	<0.003
HDWA-21-SC-079	菠菜	<0.003	<0.003	<0.003	<0.003	<0.003	<0.003	<0.003	<0.003
HDWA-21-SC-080	马铃薯	<0.003	<0.003	<0.003	<0.003	<0.003	<0.003	<0.003	<0.003
HDGP-21-SC-081	菠菜	<0.003	<0.003	<0.003	<0.003	<0.003	<0.003	<0.003	<0.003
HDGP-21-SC-082	叶用莴苣	<0.003	<0.003	<0.003	<0.003	<0.003	<0.003	<0.003	<0.003
HDGP-21-SC-083	马铃薯	<0.003	<0.003	<0.003	<0.003	<0.003	<0.003	<0.003	<0.003
HDGP-21-SC-084	马铃薯	<0.003	<0.003	<0.003	<0.003	<0.003	<0.003	<0.003	<0.003
HDQZ-21-SC-085	叶用莴苣	<0.003	<0.003	<0.003	<0.003	<0.003	<0.003	<0.003	<0.003
HDQZ-21-SC-086	菠菜3	0.46	<0.003	<0.003	0.047	<0.003	0.135	<0.003	<0.003
HDQZ-21-SC-087	马铃薯	<0.003	<0.003	<0.003	<0.003	<0.003	<0.003	<0.003	<0.003
		多菌灵	甲霜灵	嘧霉胺	烯酰吗啉	三唑酮	苯醚甲环唑	戊唑醇	丙环唑
HDYN-18-SC0187	山药1	0.006	-0.001	-0.001	-0.001	-0.001	-0.001	-0.001	-0.001
HDYN-18-SC0188	萝卜2	-0.001	0.006	-0.001	-0.001	-0.001	-0.001	0.004	-0.001
HDYN-18-SC0189	叶用莴苣3	-0.001	-0.001	-0.001	0.004	-0.001	0.078	-0.001	0.182
HDYN-18-SC0190	尖椒	-0.001	0.002	-0.001	-0.001	-0.001	-0.001	-0.001	-0.001
HDYN-18-SC0191	韭菜1	-0.001	-0.001	-0.001	0.004	-0.001	-0.001	0.002	-0.001
HDYN-18-SC0192	菠菜	-0.001	-0.001	-0.001	-0.001	-0.001	-0.001	-0.001	-0.001
HDYN-18-SC0193	长豆角4	-0.001	0.002	-0.001	-0.001	0.141	0.218	0.131	0.2
HDYN-18-SC0194	芹菜4	-0.001	-0.001	0.002	0.004	-0.001	0.036	0.008	0.008
		0.092	0.004	0.157	0.013	0.012	0.006	0.007	0.008
		0.022	0.01	0.157	0.01	0.008	0.374	0.007	0.01
		0.176	0.031	0.136	2.52	0.012	0.118	0.007	0.634
		0.092	0.17	0.137	0.084	0.008	1.16	0.007	0.008
		0.222	0.006	0.75	0.118	0.141	0.072	0.009	0.147
		0.018			0.013		0.009	0.009	0.008
		0.005			0.01		0.044	0.011	0.182
		0.46			0.012		2.21/2.18	0.007	0.2
		0.006			0.047		0.032	0.008	0.008
					0.004		0.016	0.474
					0.004		0.022	0.013
					0.004		0.135	0.008
							0.078	0.006
							0.218	0.008
							0.036	0.017
								0.004
								0.131
								0.008

## Sheet: RQ
Analyte	Gender	BW(Kg)	Fi((kg/d))	STMRi (mg/Kg)	NEDI [mg/(kg bw•days)]	ADI (mg/Kg bw)	RQ
carbendazim	Male	66.2	0.2632	0.092	0.000365776	0.03	0.0121925
	Female	57.3	0.242	0.092	0.000388551	0.03	0.0129517
metalaxyl	Male	66.2	0.2632	0.01	3.97583e-05	0.08	0.000496979
	Female	57.3	0.242	0.01	4.22339e-05	0.08	0.000527923
mepanipyrim	Male	66.2	0.2632	0.157	0.000624205	0.2	0.00312103
	Female	57.3	0.242	0.157	0.000663072	0.2	0.00331536
dimethomorph	Male	66.2	0.2632	0.013	5.16858e-05	0.2	0.000258429
	Female	57.3	0.242	0.013	5.4904e-05	0.2	0.00027452
triazolone	Male	66.2	0.2632	0.012	4.771e-05	0.03	0.00159033
	Female	57.3	0.242	0.012	5.06806e-05	0.03	0.00168935
difenoconazole	Male	66.2	0.2632	0.072	0.00028626	0.01	0.028626
	Female	57.3	0.242	0.072	0.000304084	0.01	0.0304084
tebuconazole	Male	66.2	0.2632	0.008	3.18066e-05	0.03	0.00106022
	Female	57.3	0.242	0.008	3.37871e-05	0.03	0.00112624
propiconazo	Male	66.2	0.2632	0.01	3.97583e-05	0.07	0.000567976
	Female	57.3	0.242	0.01	4.22339e-05	0.07	0.000603341

## Sheet: Me
Analyte	Leek	cabbage	Spinach	Chinese cabbage	celery	crowndaisy chrysanthemum	water spinach	coriander	Lettuce	pepper	potato	Dioscorea opposita	radish
carbendazim	62	102	57	98	124	89	67	134	95	112	89	102	108	95.3077
metalaxyl	59	89	69	86	118	85	78	107	86	118	96	94	115	92.3077
mepanipyrim	61	85	81	81	135	69	81	89	85	151	95	89	102	92.6154
dimethomorph	71	79	83	85	91	84	56	91	83	147	84	77	81	85.5385
triazolone	82	91	92	86	65	91	91	82	91	162	79	89	98	92.2308
difenoconazole	94	93	68	87	75	86	110	119	91	108	89	91	76	91.3077
tebuconazole	69	103	79	89	85	57	82	57	86	89	81	98	91	82
propiconazo	81	89	85	82	63	86	91	81	57	131	89	106	82	86.3846
	韭菜Leek	洋白菜cabbage	菠菜Spinach	大白菜Chinese cabbage	芹菜celery	茼蒿 crowndaisy chrysanthemum	蕹菜water spinach	香菜coriander	叶用莴苣Lettuce	辣椒pepper	马铃薯potato	山药Dioscorea opposita	萝卜radish
	72.375	91.375	76.75	86.75	94.5	80.875	82	95	84.25	127.25	87.75	93.25	94.125

## Sheet: recovery RSD calibrate curves
		relative deviation		relative deviation		relative deviation		relative deviation		relative deviation		relative deviation		relative deviation		relative deviation
	carbendazim		metalaxyl		mepanipyrim		dimethomorph		triazolone		difenoconazole		tebuconazole		propiconazo
	3.7	0.0373832	4.2	-0.00395257	4.8	-0.0204082	5.8	0.0295858	4.1	0.0379747	3.9	0.0934579	3.8	0.00440529	3.6	-0.0608696
	3.8	0.0654206	4.1	-0.027668	5.1	0.0408163	5.6	-0.00591716	4	0.0126582	3.8	0.0654206	4.1	0.0837004	3.9	0.0173913
	3.4	-0.046729	4.2	-0.00395257	4.9	0	5.7	0.0118343	4.1	0.0379747	3.3	-0.0747664	3.6	-0.0484581	4.1	0.0695652
	3.6	0.00934578	4.5	0.0671937	5.2	0.0612245	5.6	-0.00591716	3.9	-0.0126582	3.4	-0.046729	3.8	0.00440529	4.1	0.0695652
	3.5	-0.0186916	4.1	-0.027668	4.6	-0.0612245	5.7	0.0118343	3.9	-0.0126582	3.8	0.0654206	3.6	-0.0484581	3.8	-0.00869565
	3.4	-0.046729	4.2	-0.00395257	4.8	-0.0204082	5.4	-0.0414201	3.7	-0.0632911	3.2	-0.102804	3.8	0.00440529	3.5	-0.0869565
STDEV	0.163299		0.147196		0.219089		0.136626		0.151658		0.301109		0.183485		0.250333
AVERAGE	3.56667		4.21667		4.9		5.63333		3.95		3.56667		3.78333		3.83333
RSD	0.0457849		0.0349081		0.044712		0.0242531		0.0383943		0.0844231		0.0484982		0.0653043
Recovery	0.713333		0.843333		0.98		1.12667		0.79		0.713333		0.756667		0.766667
	39	-0.0325442	38.4	0.0308725	51.2	0.0427699	51.8	-0.0454545	45.7	0.0343267	42.8	-0.027641	38.5	-0.0123985	41.2	0.0265781
	41.2	0.0213462	36.5	-0.0201342	48.6	-0.0101833	51.8	-0.0454545	42.8	-0.0313089	43.7	-0.00719424	39.1	0.00299273	43.8	0.0913621
	38.6	-0.0423425	36.4	-0.0228188	46.7	-0.0488798	54.8	0.00982801	43.9	-0.00641267	43.9	-0.00265051	41.2	0.0568619	41.7	0.0390365
	38.1	-0.0545903	35.9	-0.0362416	48.4	-0.0142566	54.7	0.00798526	43.8	-0.00867597	44.5	0.0109807	37.5	-0.0380504	38.9	-0.0307309
	42.8	0.0605393	37.1	-0.00402685	47.6	-0.0305499	56.1	0.0337838	47.1	0.0660128	45.1	0.0246119	38.5	-0.0123985	37.8	-0.0581395
	41.6	0.0311445	39.2	0.052349	52.1	0.0610998	56.4	0.039312	41.8	-0.0539419	44.1	0.00189322	39.1	0.00299273	37.4	-0.0681063
STDEV	1.90412		1.28491		2.10523		2.02748		1.9302		0.775672		1.23356		2.50892
AVERAGE	40.2167		37.25		49.1		54.2667		44.1833		44.0167		38.9833		40.1333
RSD	0.0473465		0.0344943		0.0428764		0.0373614		0.0436861		0.0176222		0.0316432		0.0625146
Recovery	0.804333		0.745		0.982		1.08533		0.883667		0.880333		0.779667		0.802667
	164.8	0.0434783	143	-0.0300701	197.2	0.0315606	224.8	0.0168878	162.4	-0.0273508	168.4	0.0118165	158.2	0.00274667	157.8	0.0108905
	153.6	-0.0274377	144.8	-0.0178612	190.2	-0.00505667	217.8	-0.0147768	169	0.0121781	162.4	-0.0242339	162.4	0.0293683	158.2	0.0134529
	145.2	-0.0806247	148.2	0.00520009	188.2	-0.0155187	222.8	0.00784077	167.6	0.00379317	167.6	0.00700981	157	-0.0048595	162.4	0.0403587
	164	0.0384128	146.2	-0.00836536	185.4	-0.0301656	224.2	0.0141737	169.8	0.0169695	167.2	0.00460645	153.8	-0.0251426	151.6	-0.0288277
	158	0.000422119	150.2	0.0187655	197	0.0305144	227	0.0268396	165.6	-0.00818527	168.2	0.0106149	157	-0.0048595	153.8	-0.0147341
	162	0.0257493	152.2	0.032331	189	-0.0113339	209.8	-0.050965	167.4	0.00259533	164.8	-0.00981374	158.2	0.00274667	152.8	-0.0211403
STDEV	7.50218		3.43725		4.86032		6.31781		2.66358		2.36107		2.784		4.08461
AVERAGE	157.933		147.433		191.167		221.067		166.967		166.433		157.767		156.1
RSD	0.0475022		0.0233139		0.0254245		0.0285787		0.0159528		0.0141863		0.0176463		0.0261666
Recovery	0.789667		0.737167		0.955833		1.10533		0.834833		0.832167		0.788833		0.7805
	carbendazim	metalaxyl	mepanipyrim	dimethomorph	triazolone	difenoconazole	tebuconazole	propiconazo
5μg/L	0.713333	0.843333	0.98	1.12667	0.79	0.713333	0.756667	0.766667
50μg/L	0.804333	0.745	0.982	1.08533	0.883667	0.880333	0.779667	0.802667
200μg/L	0.789667	0.737167	0.955833	1.10533	0.834833	0.832167	0.788833	0.7805
	0.769111	0.775167	0.972611	1.10578	0.836167	0.808611	0.775056	0.783278
	0.0457849	0.0349081	0.044712	0.0242531	0.0383943	0.0844231	0.0484982	0.0653043
	0.0473465	0.0344943	0.0428764	0.0373614	0.0436861	0.0176222	0.0316432	0.0625146
	0.0475022	0.0233139	0.0254245	0.0285787	0.0159528	0.0141863	0.0176463	0.0261666

## Sheet: LOD+LOQ
		5μg/L S/N			峰高
多菌灵9	carbendazim	1356	0.475289	0.70799	809714	0.584337	1.01397
甲霜灵5	metalaxyl	2853	1	0.3365	1385697	1	0.5925
嘧霉胺5	mepanipyrim	865	0.30319	1.10987	332905	0.240244	2.46625
烯酰吗啉dimethomorph12	dimethomorph	379	0.132843	2.53307	144518	0.104293	5.68113
三唑酮5	triazolone	258	0.0904311	3.72106	121232	0.0874881	6.77235
苯醚甲环唑15	difenoconazole	309	0.108307	3.10691	216879	0.156513	3.78564
戊唑醇18	tebuconazole	1346	0.471784	0.71325	659304	0.475792	1.24529
丙环唑9	propiconazo	192.07	0.0673221	4.99836	164210	0.118504	4.99985
